# Supplementary figures and images for: Processes of formation and transformation of sulfur oxides during combustion of coals and coal-based compositions
Source: Research Square preprint supplement (doi:10.21203/rs.3.rs-8140843/v1), 2026-01-29

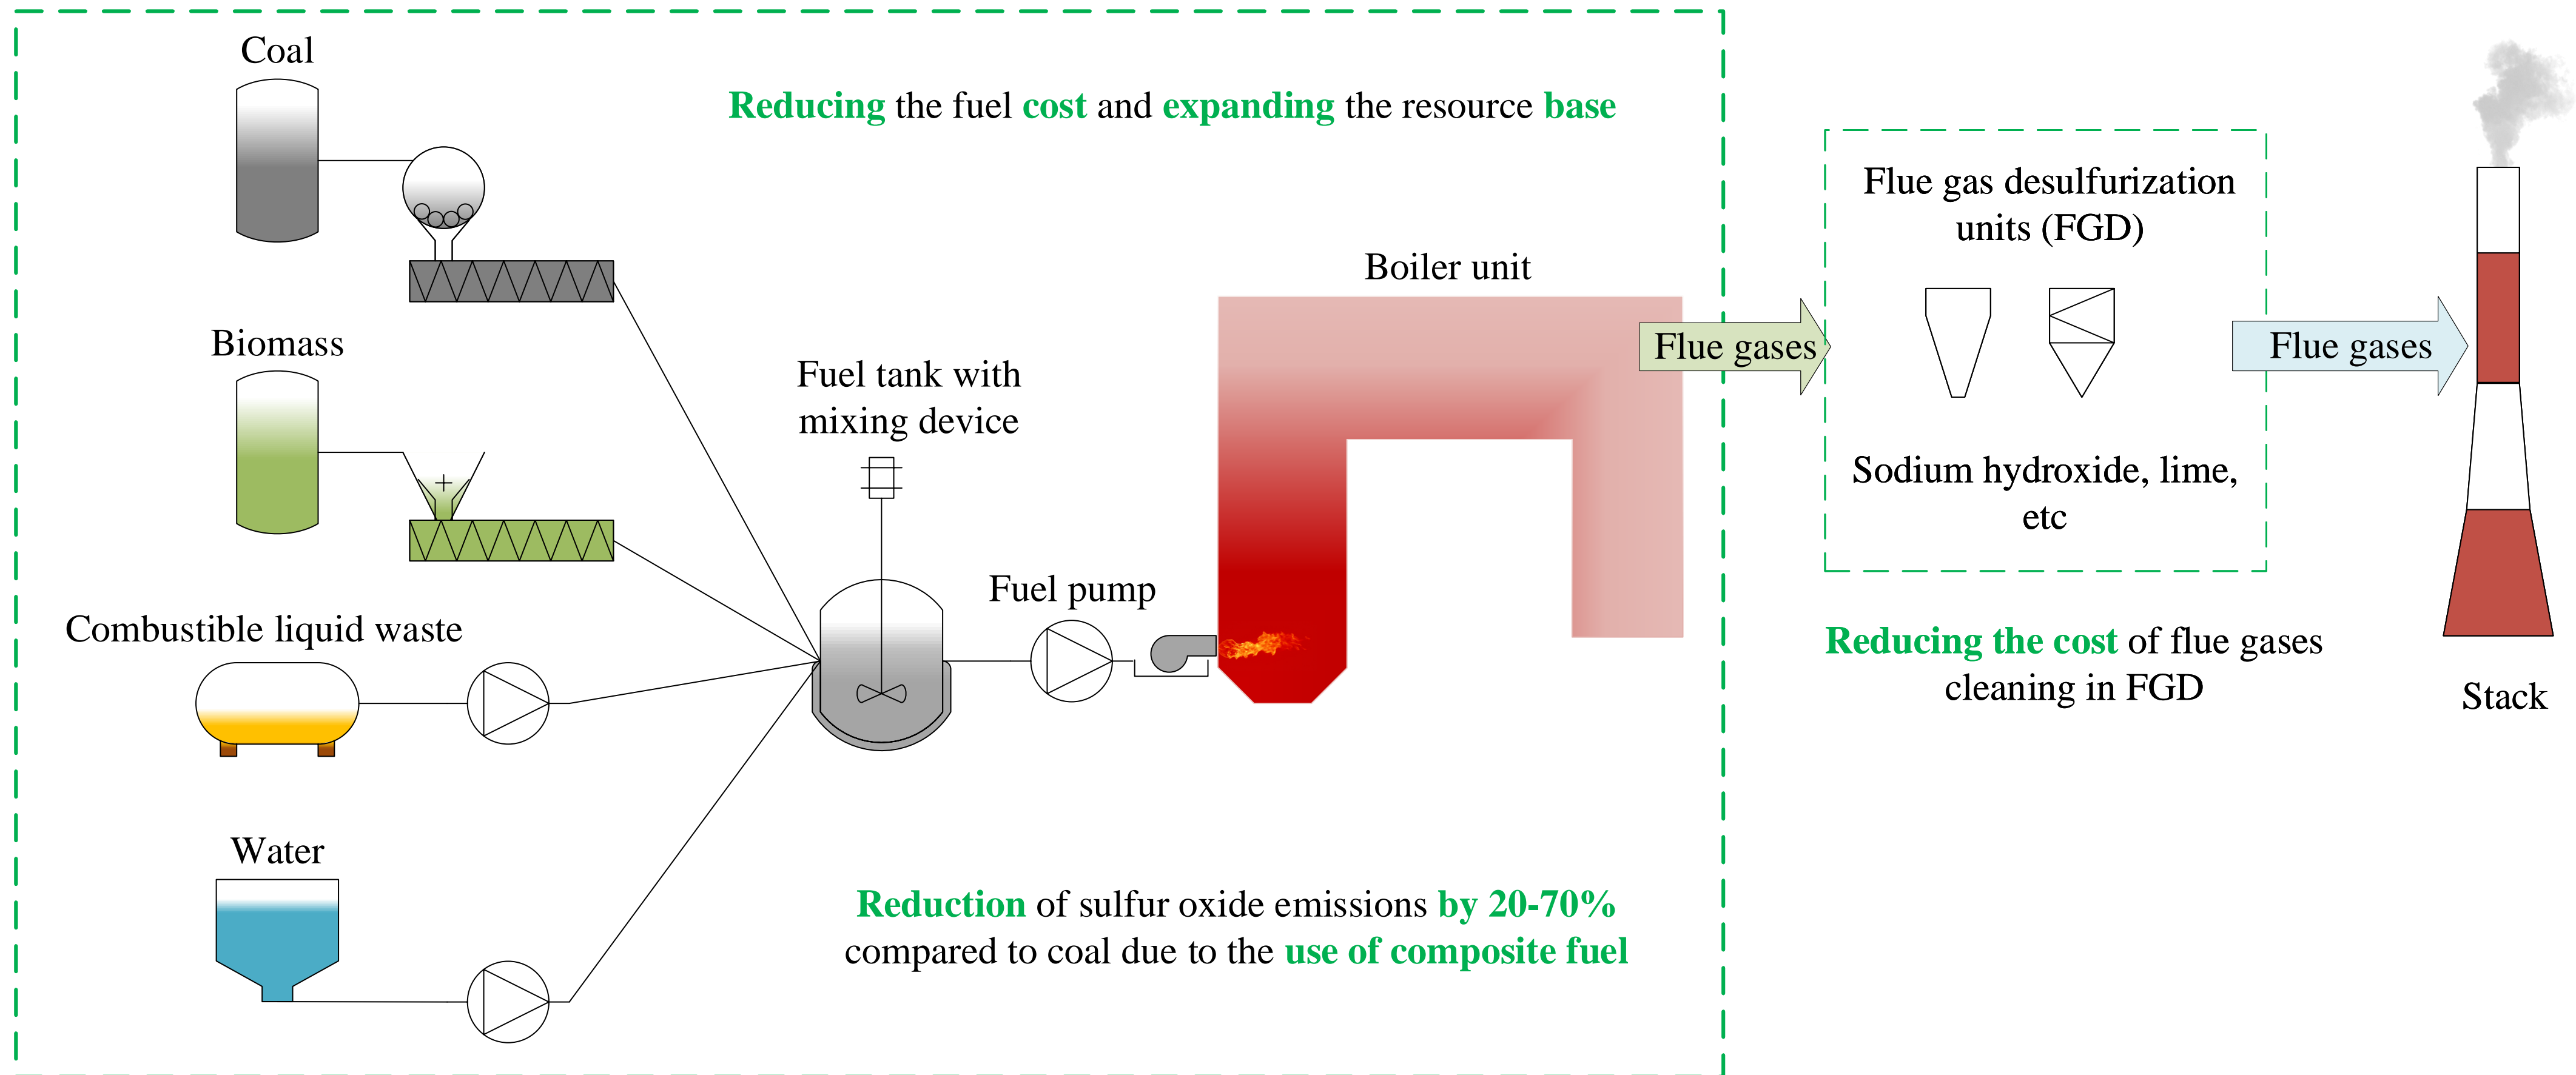

Supplement: Supplementary file 1 [file 49149521a14db4028a14897c.pdf]
